# Supplementary material for: Studies towards the synthesis of hyperireflexolide A
Source: publisher site journal article supplement (doi:10.3762/bjoc.14.185), 2018-08-13

## **Supporting Information**

**for**

## **Studies towards the synthesis of hyperireflexolide A**

G. Hari Mangeswara Rao<sup>\*,1,2</sup>

Address: <sup>1</sup>Department of Chemistry, Indian Institute of Technology Kanpur, Kanpur-208016, India and <sup>2</sup>Department of Chemistry, Texila American University, Georgetown, Guyana

Email: G. Hari Mangeswara Rao<sup>1</sup> - harimangesh@gmail.com

\*Corresponding author

**Copies of <sup>1</sup>H and <sup>13</sup>C NMR Spectra**

# $^1\text{H}$ and $^{13}\text{C}$ NMR Spectra

$^1\text{H}$  NMR (500 MHz) and  $^{13}\text{C}$  NMR (125 MHz) of 4

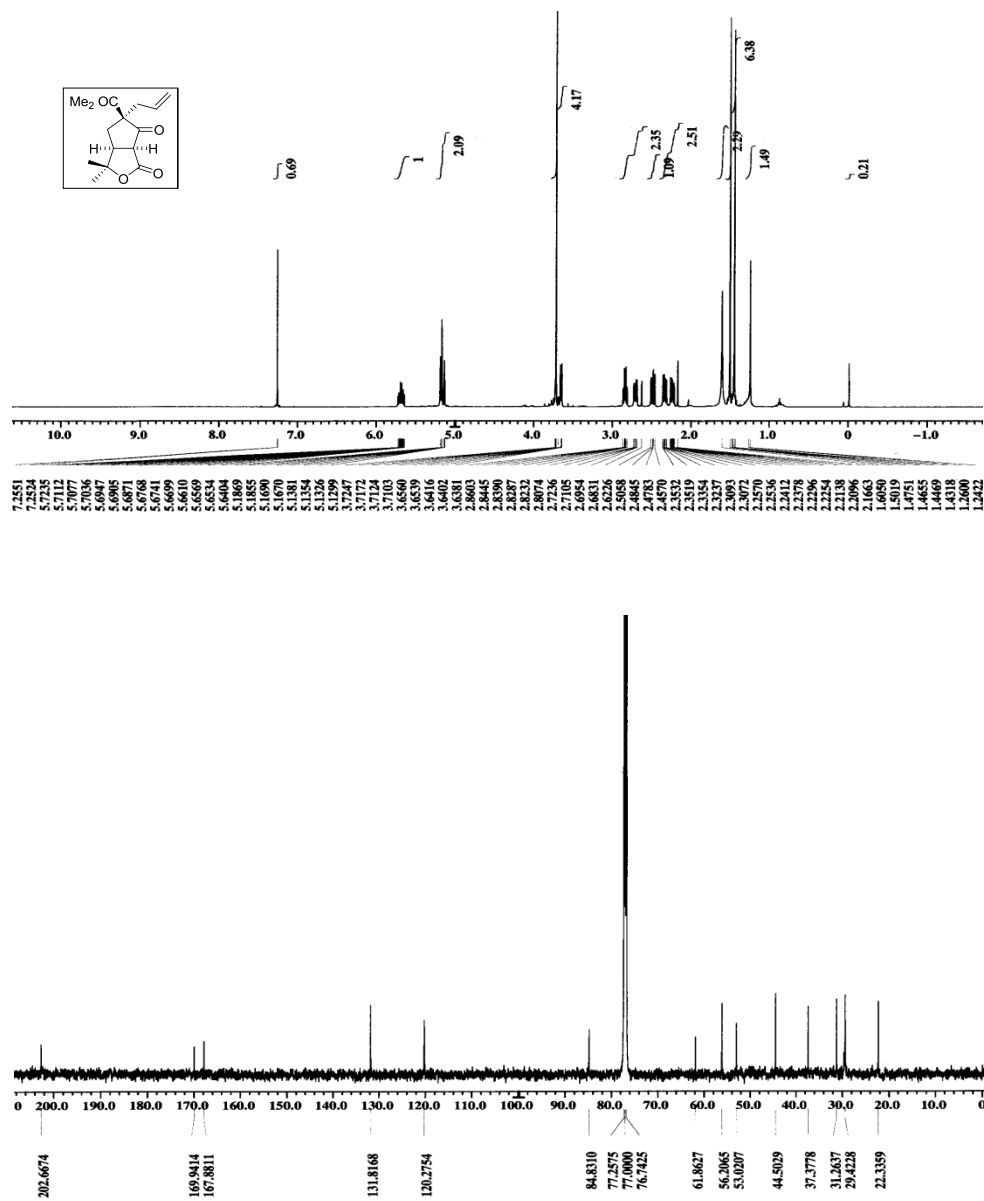

$^1\text{H}$  NMR (500 MHz) and  $^{13}\text{C}$  NMR (100 MHz) of **10**

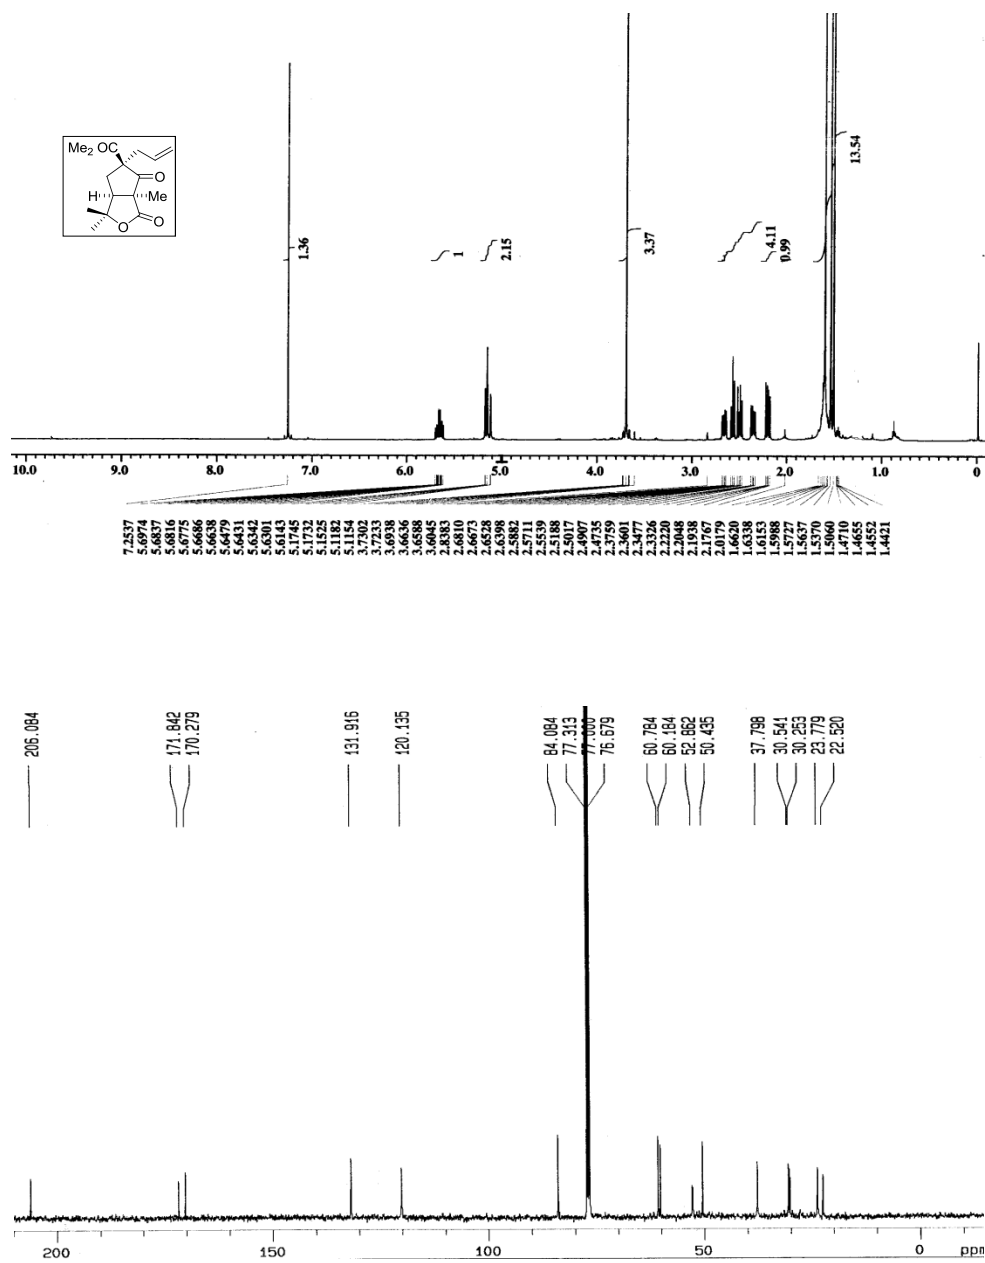

$^1\text{H}$  NMR (500 MHz) and  $^{13}\text{C}$  NMR (125 MHz) of **11**

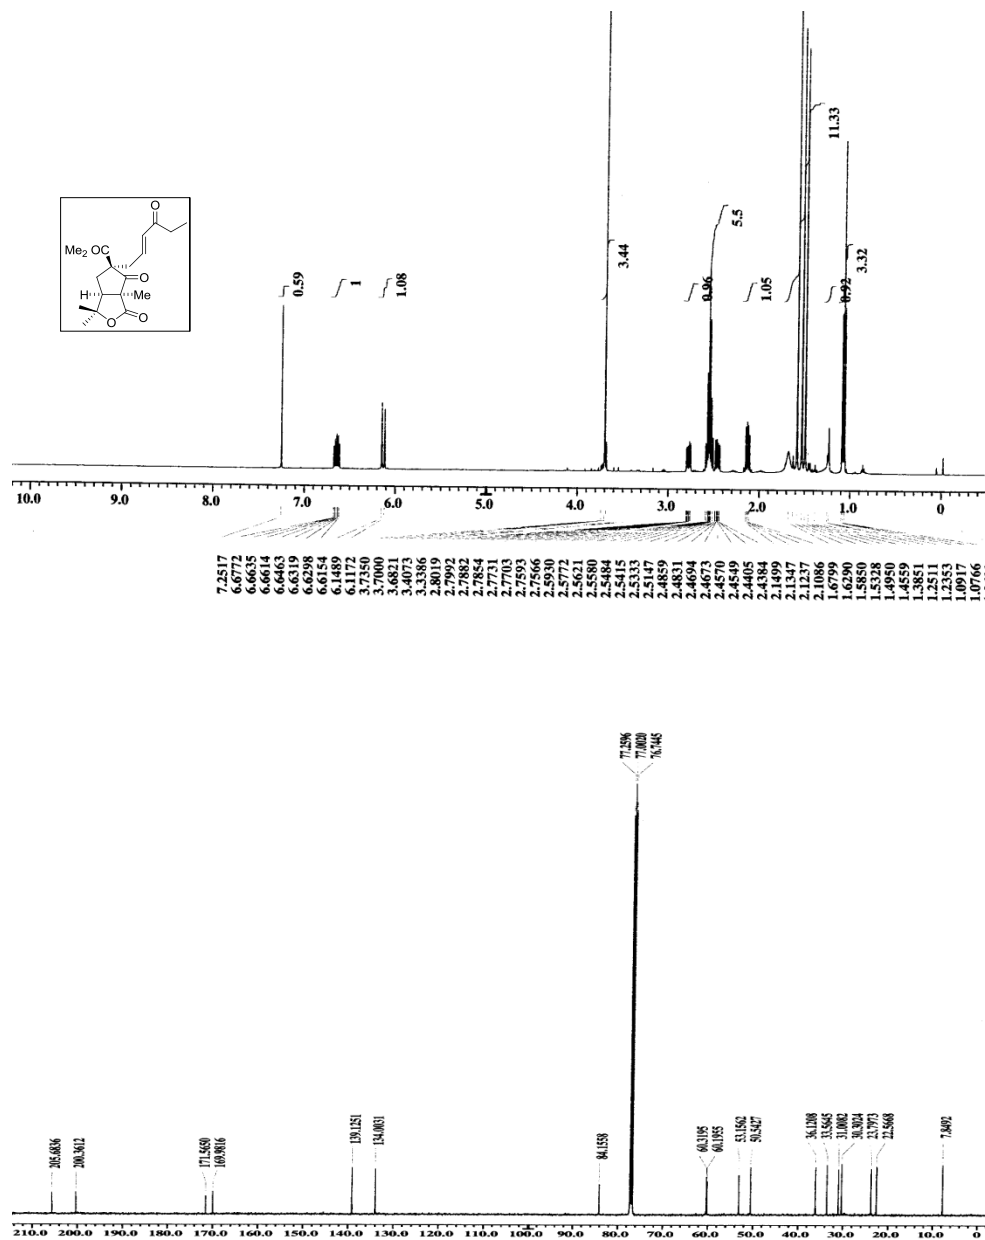

Supplement: Additional file 1 [file 1860-5397-14-185-S1.pdf]
